# Supplementary material
Source: PubMed Central journal article supplement (PMC5931801)

# Longitudinal model variable importance

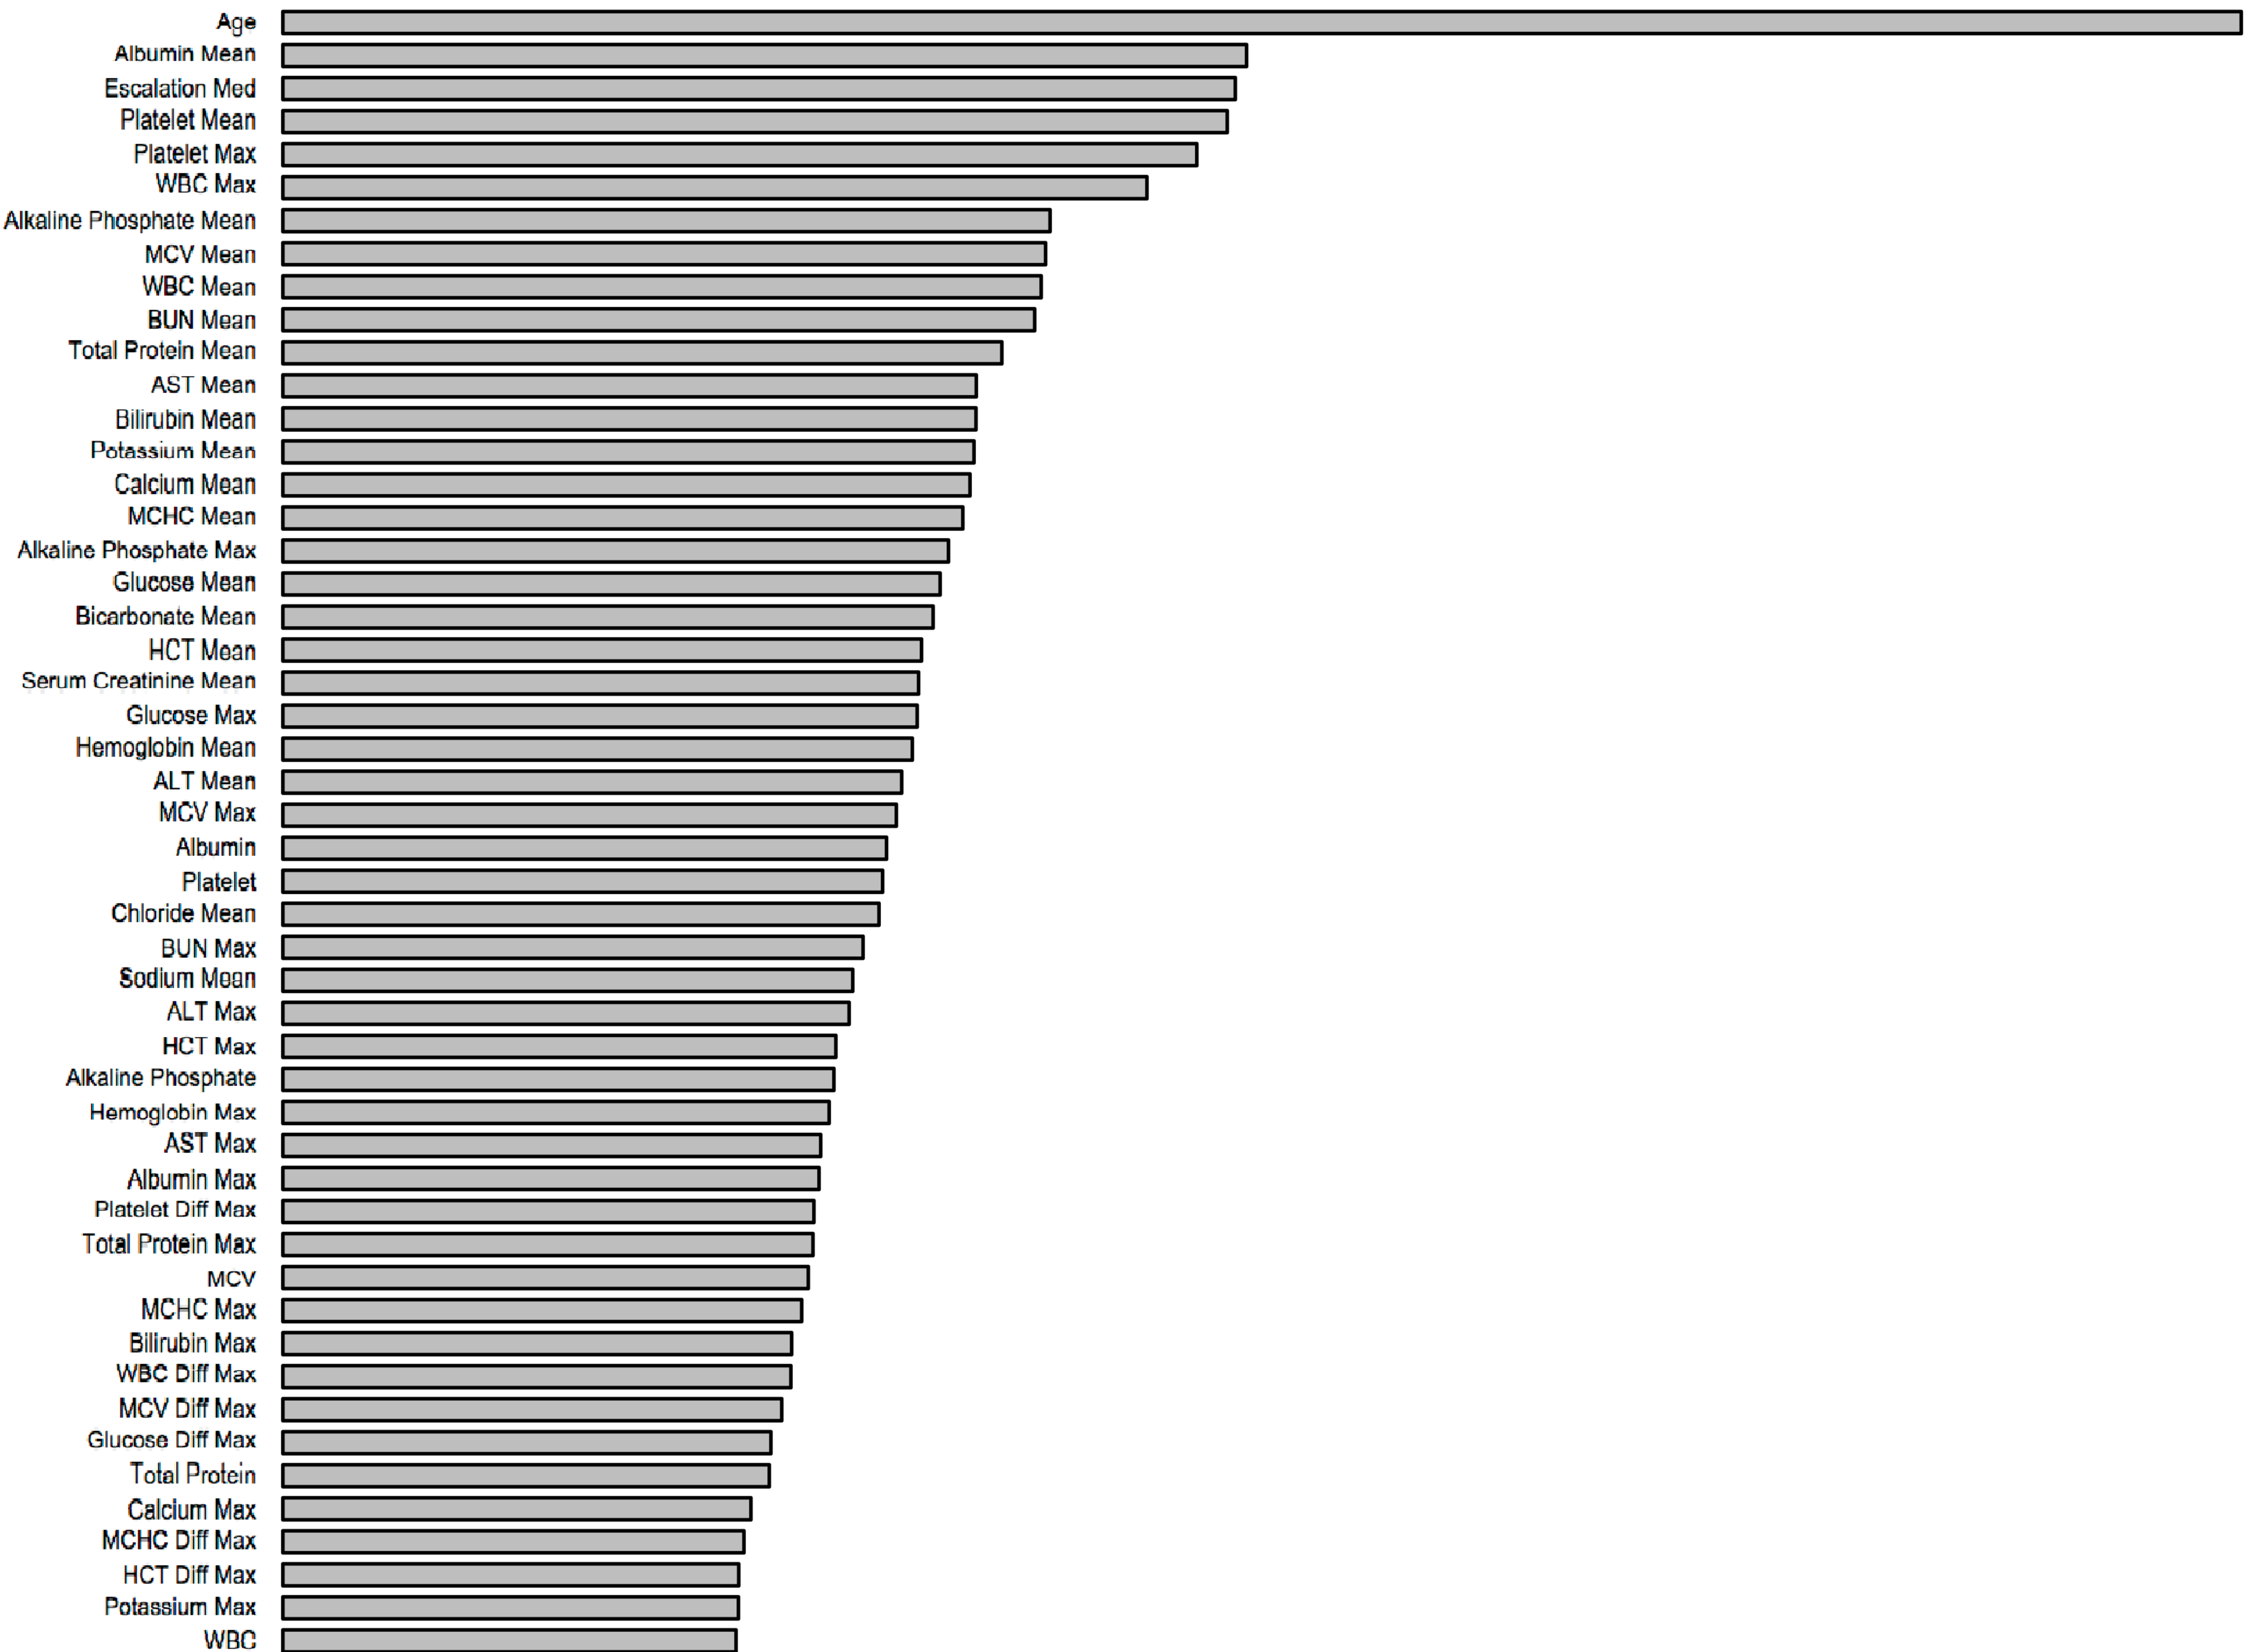

Top 50 scaled variable importance (all scores sum up to 1)

Supplement: NIHMS960746-supplement-Supp_Fig_3a.pdf [file NIHMS960746-supplement-Supp_Fig_3a.pdf]
